# Supplementary material for: A new class of functionalized polyoxometalates: synthesis, structure and preliminary antitumor activity studies of three arylimido substituted hexamolybdates bearing a strong electron-withdrawing nitro group, (Bu4N)2[Mo6O18(NAr)] (Ar = 3-NO2-C6H4, 2-CH3-4-NO2-C6H3, 2-CH3-5-NO2-C6H3)
Source: Royal Society of Chemistry journal article supplement (doi:10.1039/b719388b), 2008-01-01
Supplement: b719388b.pdf [file b719388b.pdf]

**A New Class of Functionalized Polyoxometalates: Synthesis, Structure and Preliminary Antitumor Activity Studies of Three Arylimido Substituted Hexamolybdate Bearing a Strong Electron-withdrawing Nitro Group,  $(\text{Bu}_4\text{N})_2[\text{Mo}_6\text{O}_{18}(\equiv\text{NAr})]$  (Ar = 3-NO<sub>2</sub>-C<sub>6</sub>H<sub>4</sub>, 2-CH<sub>3</sub>-4-NO<sub>2</sub>-C<sub>6</sub>H<sub>3</sub>, 2-CH<sub>3</sub>-5-NO<sub>2</sub>-C<sub>6</sub>H<sub>3</sub>)**

Sijia Xue,<sup>\*a</sup> An Chai<sup>a</sup> Zhijuan Cai<sup>a</sup> Yongge Wei<sup>\*a,b</sup> Changsheng Xiang<sup>a</sup>  
Wangdong Bian<sup>a</sup> and Jian Shen<sup>a</sup>

<sup>a</sup> Department of Chemistry, Shanghai Normal University, Shanghai, China. E-mail: sjxue@sohu.com

<sup>b</sup> Department of Chemistry, Tsinghua University, Beijing, China. E-mail: yonggewei@mail.tsinghua.edu.cn

Table S1. Selected Bond lengths/Å and angles/° for Compounds 1, 2 and 3

| Compound 1      |           | Compound 2      |           | Compound 3      |            |
|-----------------|-----------|-----------------|-----------|-----------------|------------|
| Mo(1)-N(1)      | 1.707(10) | Mo(1)-N(1)      | 1.714(12) | Mo(1)-N(1)      | 1.737(3)   |
| Mo(1)-O(3)      | 1.901(7)  | Mo(1)-O(2)      | 1.857(12) | Mo(1)-O(17)     | 1.903(2)   |
| Mo(1)-O(18)     | 1.966(8)  | Mo(1)-O(4)      | 1.943(9)  | Mo(1)-O(2)      | 1.907(2)   |
| Mo(1)-O(2)      | 1.964(7)  | Mo(1)-O(1)      | 1.956(9)  | Mo(1)-O(3)      | 1.979(2)   |
| Mo(1)-O(4)      | 1.969(7)  | Mo(1)-O(3)      | 1.991(10) | Mo(1)-O(1)      | 1.986(2)   |
| Mo(1)-O(1)      | 2.242(6)  | Mo(1)-O(18)     | 2.210(7)  | Mo(1)-O(18)     | 2.2046(19) |
| Mo(2)-O(5)      | 1.678(7)  | Mo(2)-O(6)      | 1.675(9)  | Mo(2)-O(4)      | 1.681(3)   |
| Mo(2)-O(7)      | 1.904(7)  | Mo(2)-O(3)      | 1.841(9)  | Mo(2)-O(1)      | 1.857(2)   |
| Mo(2)-O(8)      | 1.923(7)  | Mo(2)-O(8)      | 1.906(7)  | Mo(2)-O(7)      | 1.893(3)   |
| Mo(2)-O(3)      | 1.935(8)  | Mo(2)-O(7)      | 1.938(8)  | Mo(2)-O(6)      | 1.964(2)   |
| Mo(2)-O(6)      | 1.973(6)  | Mo(2)-O(5)      | 1.957(7)  | Mo(2)-O(5)      | 1.969(2)   |
| Mo(2)-O(1)      | 2.339(6)  | Mo(2)-O(18)     | 2.330(7)  | Mo(2)-O(18)     | 2.3259(19) |
| Mo(3)-O(9)      | 1.683(6)  | Mo(3)-O(9)      | 1.681(7)  | Mo(3)-O(8)      | 1.680(3)   |
| Mo(3)-O(6)      | 1.896(6)  | Mo(3)-O(10)     | 1.889(8)  | Mo(3)-O(3)      | 1.869(2)   |
| Mo(3)-O(2)      | 1.919(6)  | Mo(3)-O(1)      | 1.900(9)  | Mo(3)-O(6)      | 1.900(2)   |
| Mo(3)-O(10)     | 1.944(6)  | Mo(3)-O(11)     | 1.919(8)  | Mo(3)-O(9)      | 1.955(2)   |
| Mo(3)-O(11)     | 1.977(6)  | Mo(3)-O(8)      | 1.955(8)  | Mo(3)-O(10)     | 1.960(2)   |
| Mo(3)-O(1)      | 2.354(5)  | Mo(3)-O(18)     | 2.318(6)  | Mo(3)-O(18)     | 2.331(2)   |
| Mo(4)-O(12)     | 1.661(7)  | Mo(4)-O(12)     | 1.693(8)  | Mo(4)-O(11)     | 1.686(3)   |
| Mo(4)-O(13)     | 1.895(6)  | Mo(4)-O(5)      | 1.908(8)  | Mo(4)-O(13)     | 1.884(3)   |
| Mo(4)-O(14)     | 1.922(7)  | Mo(4)-O(4)      | 1.890(10) | Mo(4)-O(12)     | 1.902(2)   |
| Mo(4)-O(10)     | 1.919(6)  | Mo(4)-O(13)     | 1.896(9)  | Mo(4)-O(17)     | 1.946(2)   |
| Mo(4)-O(7)      | 1.959(7)  | Mo(4)-O(14)     | 1.960(9)  | Mo(4)-O(7)      | 1.972(3)   |
| Mo(4)-O(1)      | 2.370(6)  | Mo(4)-O(18)     | 2.326(6)  | Mo(4)-O(18)     | 2.324(2)   |
| Mo(5)-O(15)     | 1.701(7)  | Mo(5)-O(15)     | 1.673(10) | Mo(5)-O(14)     | 1.689(2)   |
| Mo(5)-O(4)      | 1.882(7)  | Mo(5)-O(7)      | 1.871(8)  | Mo(5)-O(15)     | 1.895(2)   |
| Mo(5)-O(11)     | 1.907(6)  | Mo(5)-O(11)     | 1.918(7)  | Mo(5)-O(10)     | 1.899(2)   |
| Mo(5)-O(13)     | 1.945(7)  | Mo(5)-O(13)     | 1.928(8)  | Mo(5)-O(2)      | 1.930(2)   |
| Mo(5)-O(16)     | 1.975(6)  | Mo(5)-O(16)     | 1.964(9)  | Mo(5)-O(12)     | 1.956(2)   |
| Mo(5)-O(1)      | 2.337(5)  | Mo(5)-O(18)     | 2.368(7)  | Mo(5)-O(18)     | 2.3281(19) |
| Mo(6)-O(17)     | 1.687(7)  | Mo(6)-O(17)     | 1.670(10) | Mo(6)-O(16)     | 1.679(3)   |
| Mo(6)-O(16)     | 1.909(7)  | Mo(6)-O(16)     | 1.872(9)  | Mo(6)-O(5)      | 1.883(2)   |
| Mo(6)-O(18)     | 1.911(8)  | Mo(6)-O(14)     | 1.893(8)  | Mo(6)-O(9)      | 1.889(2)   |
| Mo(6)-O(14)     | 1.940(8)  | Mo(6)-O(2)      | 1.944(11) | Mo(6)-O(15)     | 1.939(2)   |
| C(1)-N(1)-Mo(1) | 167.1(10) | Mo(6)-O(10)     | 1.962(7)  | Mo(6)-O(13)     | 1.954(3)   |
|                 |           | Mo(6)-O(18)     | 2.313(7)  | Mo(6)-O(18)     | 2.3745(19) |
|                 |           | C(1)-N(1)-Mo(1) | 152.5(15) | C(1)-N(1)-Mo(1) | 169.1(3)   |

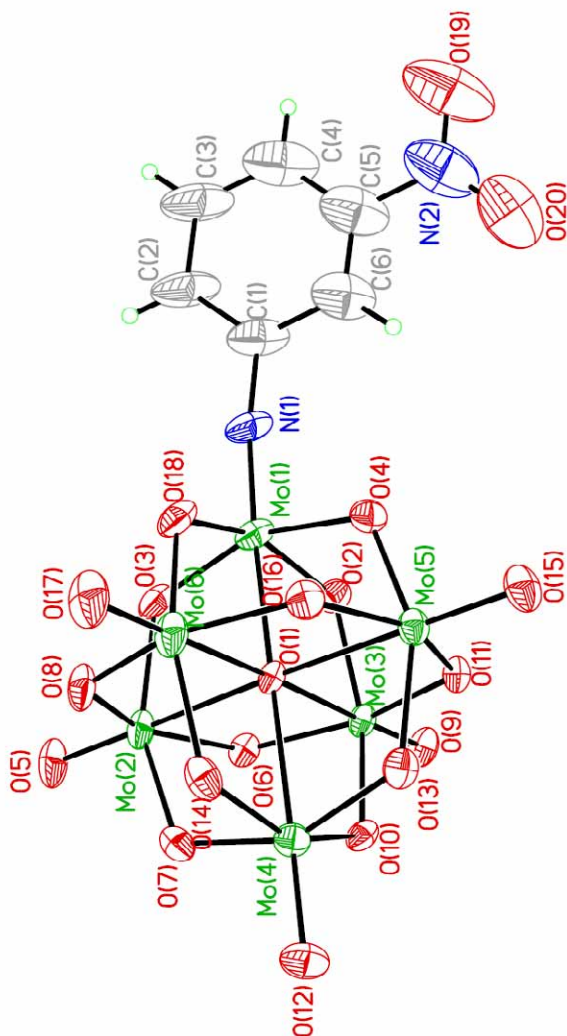

Figure S1. ORTEP viewing of the nitro-functionalized arylimido hexamolybdate ion **1**

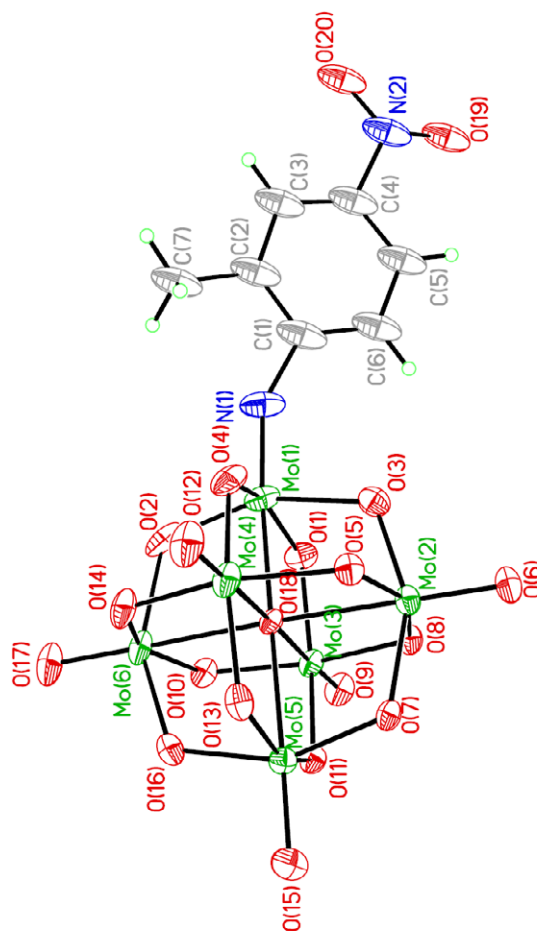

Figure S2. ORTEP viewing of the nitro-functionalized arylimido hexamolybdate ion 2

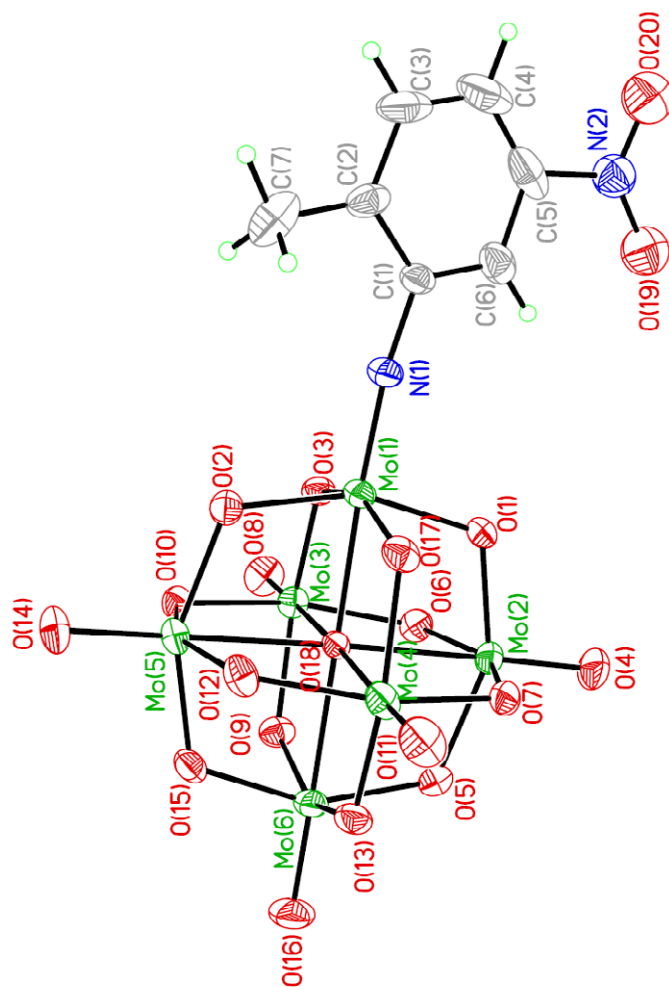

Figure S3. ORTEP viewing of the nitro-functionalized arylimido hexamolybdate ion **3**
